# Supplementary material for: Short versus Long Gonadotropin-Releasing Hormone Analogue Suppression Protocols in IVF/ICSI Cycles in Patients of Various Age Ranges
Source: PubMed Central journal article supplement (PMC4514806; doi:10.1371/journal.pone.0133887), 2015-07-24
Supplement: pone.0133887.s001.pdf [file pone.0133887.s001.pdf]

| Variable                                 | Groups              |                      | <i>P</i> |
|------------------------------------------|---------------------|----------------------|----------|
|                                          | Long Protocol Group | Short Protocol Group |          |
| Total dose of Gn                         |                     |                      |          |
| <31 years                                | 2127.20±664.55      | 1770.12±746.28       | <0.05    |
| 31-35 years                              | 2489.32±723.40      | 2079.01±759.75       | <0.05    |
| 36-40 years                              | 2860.48±751.14      | 2275.78±706.88       | <0.05    |
| >40 years                                | 3461.10±779.80      | 2457.69±676.51       | <0.05    |
| Duration of stimulation                  |                     |                      |          |
| <31 years                                | 11.68±1.89          | 8.55±2.05            | <0.05    |
| 31-35 years                              | 11.53±1.72          | 8.85±2.07            | <0.05    |
| 36-40 years                              | 11.60±1.70          | 8.76±2.00            | <0.05    |
| >40 years                                | 11.53±1.50          | 8.92±1.90            | <0.05    |
| E <sub>2</sub> levels on hCG trigger day |                     |                      |          |
| <31 years                                | 2821.05±1302.86     | 2791.76±1411.31      | ns       |
| 31-35 years                              | 2585.72±1319.10     | 2333.05±1276.37      | <0.05    |
| 36-40 years                              | 2324.20±1281.79     | 2134.30±1224.02      | <0.05    |
| >40 years                                | 1935.88±1194.47     | 1782.43±1014.35      | ns       |
| No. of oocytes retrieved                 |                     |                      |          |
| <31 years                                | 13.97±5.76          | 9.78±6.09            | <0.05    |
| 31-35 years                              | 12.76±5.83          | 7.39±4.64            | <0.05    |
| 36-40 years                              | 11.45±5.73          | 6.30±4.15            | <0.05    |
| >40 years                                | 8.77±5.04           | 5.26±3.22            | <0.05    |
| No. of MII oocytes                       |                     |                      |          |
| <31 years                                | 12.24±5.36          | 8.41±5.47            | <0.05    |
| 31-35 years                              | 11.13±5.35          | 6.49±4.19            | <0.05    |
| 36-40 years                              | 10.11±5.29          | 5.55±3.69            | <0.05    |
| >40 years                                | 7.87±4.79           | 4.64±2.85            | <0.05    |
| No. of high-quality embryos              |                     |                      |          |
| <31 years                                | 5.81±3.81           | 4.05±3.12            | <0.05    |
| 31-35 years                              | 5.09±3.47           | 3.28±2.41            | <0.05    |
| 36-40 years                              | 4.61±2.89           | 2.84±1.88            | <0.05    |
| >40 years                                | 3.96±2.88           | 2.45±1.32            | <0.05    |
